# Supplementary material for: Combination of genetic analysis and ancient literature survey reveals the divergence of traditional Brassica rapa varieties from Kyoto, Japan
Source: PubMed Central journal article supplement (PMC8167115; doi:10.1038/s41438-021-00569-0), 2021-06-01
Supplement: 41438_2021_569_MOESM1_ESM.pdf [file 41438_2021_569_MOESM1_ESM.pdf]

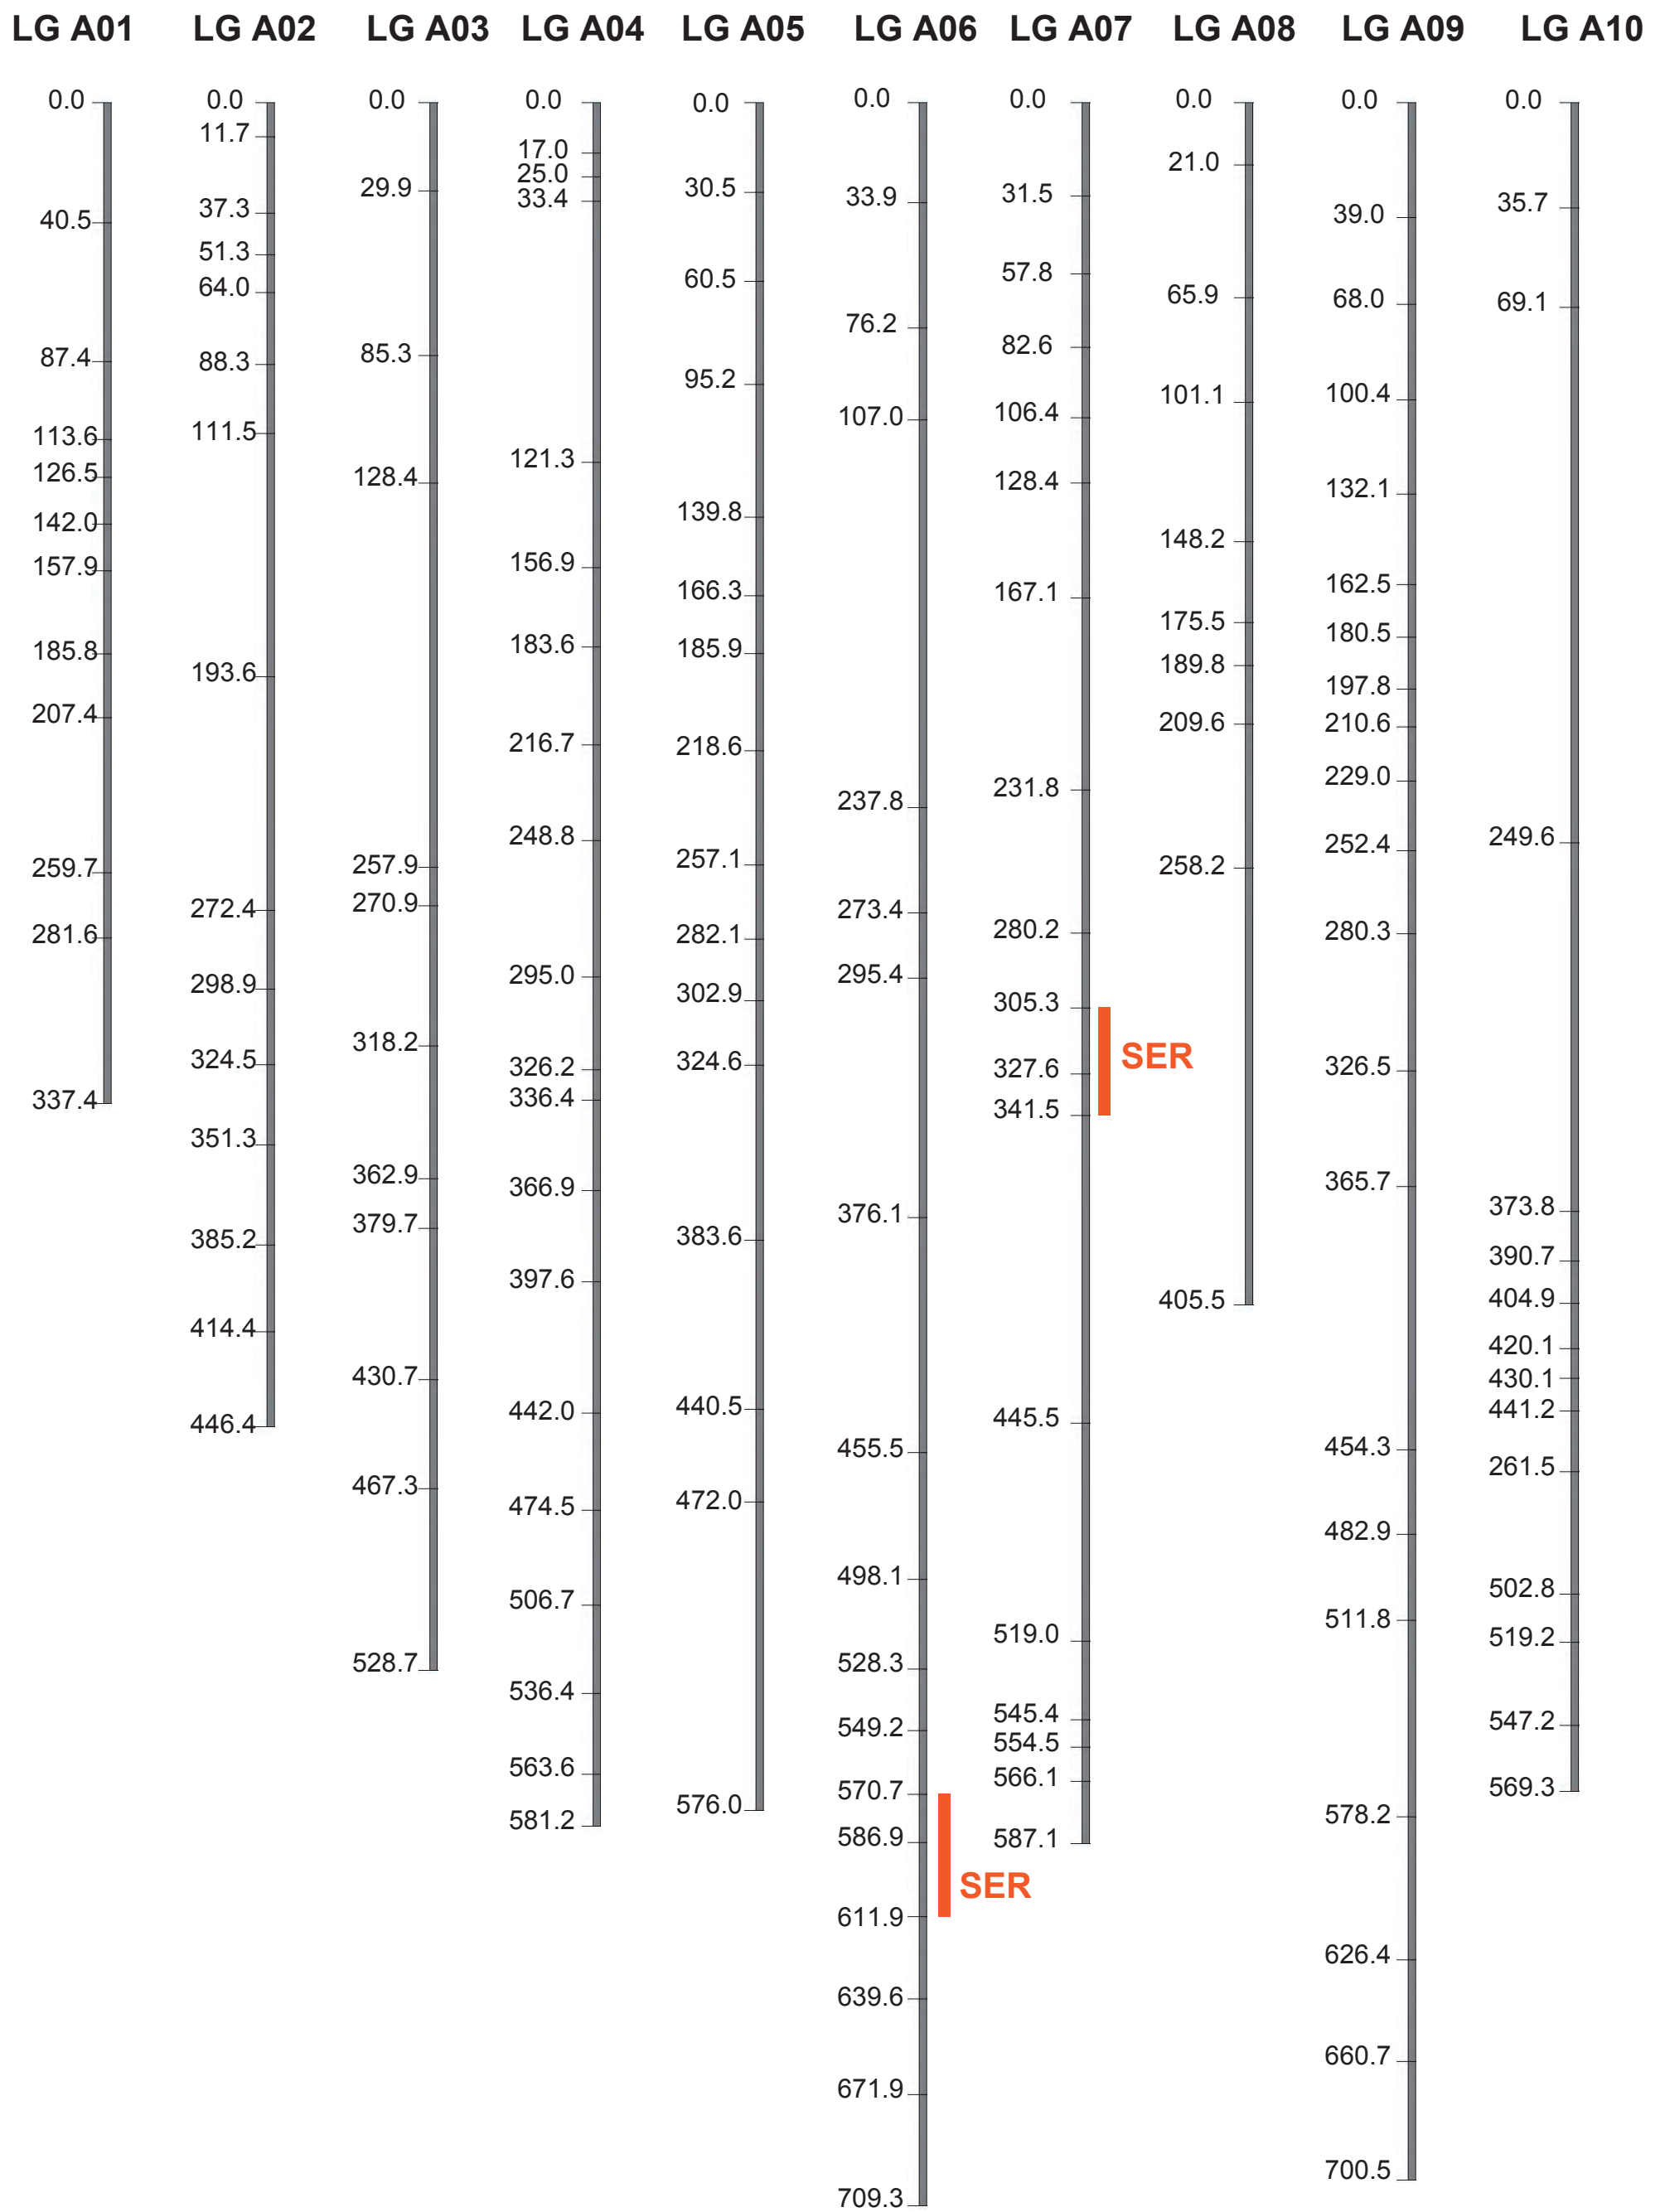

**Supplementary Figure S1 Linkage map and QTLs for serration in Mizuna and Mibuna according to 2014 RAD-seq.** QTL intervals and markers are shown on the right and left of each linkage group, respectively. The names of QTLs are described in Supplementary Table S1.

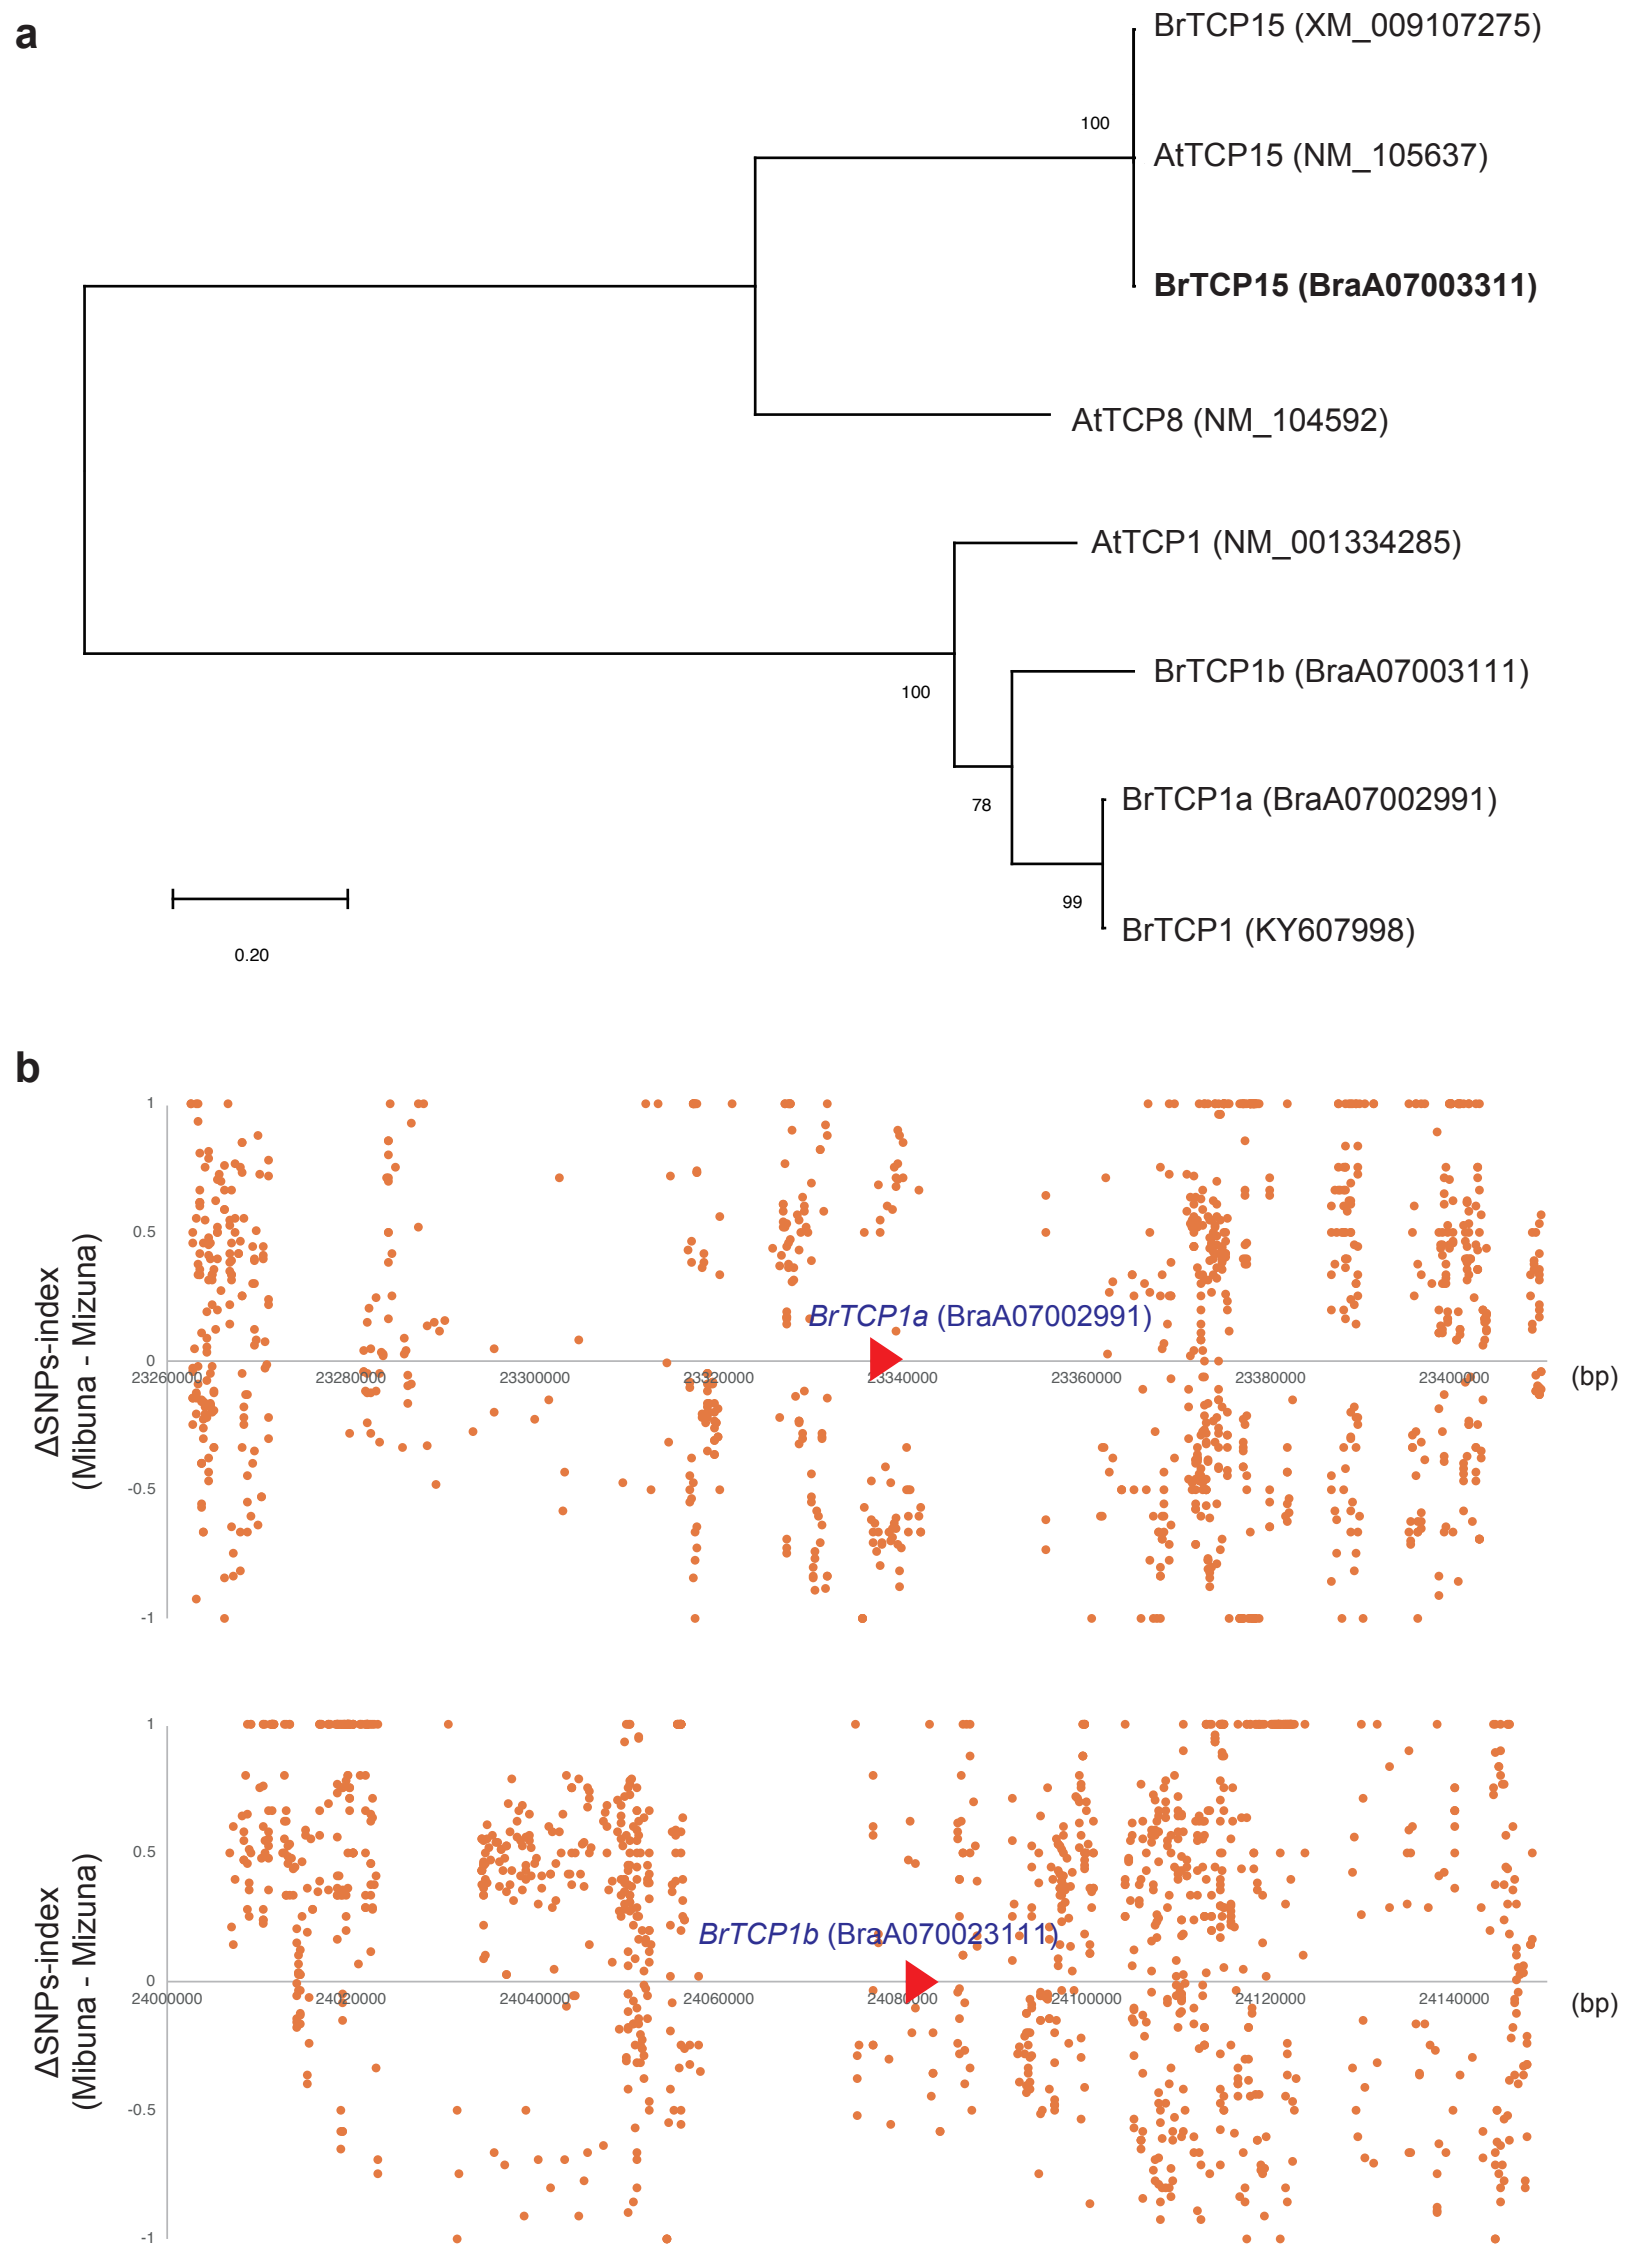

**Supplementary Figure S2 Phylogenetic tree of *BrTCP* orthologs and SNPs around other candidate genes between Mizuna and Mibuna.**

**a** Phylogenetic tree of *BrTCP* orthologs obtained by the neighbor-joining method using MEGA. The bootstrap values > 50% are indicated on branches. **b** The plot of the  $\Delta$ SNPs-index (Mibuna-Mizuna) around BraA07002991\_ *BrTCP1a* and BraA07003111\_ *BrTCP1b*. Red triangles indicate each candidate gene. The vertical axis represents the  $\Delta$ SNPs-index score, and the horizontal axis represents the position around *BrTCPs* on the chromosome A07 (bp).

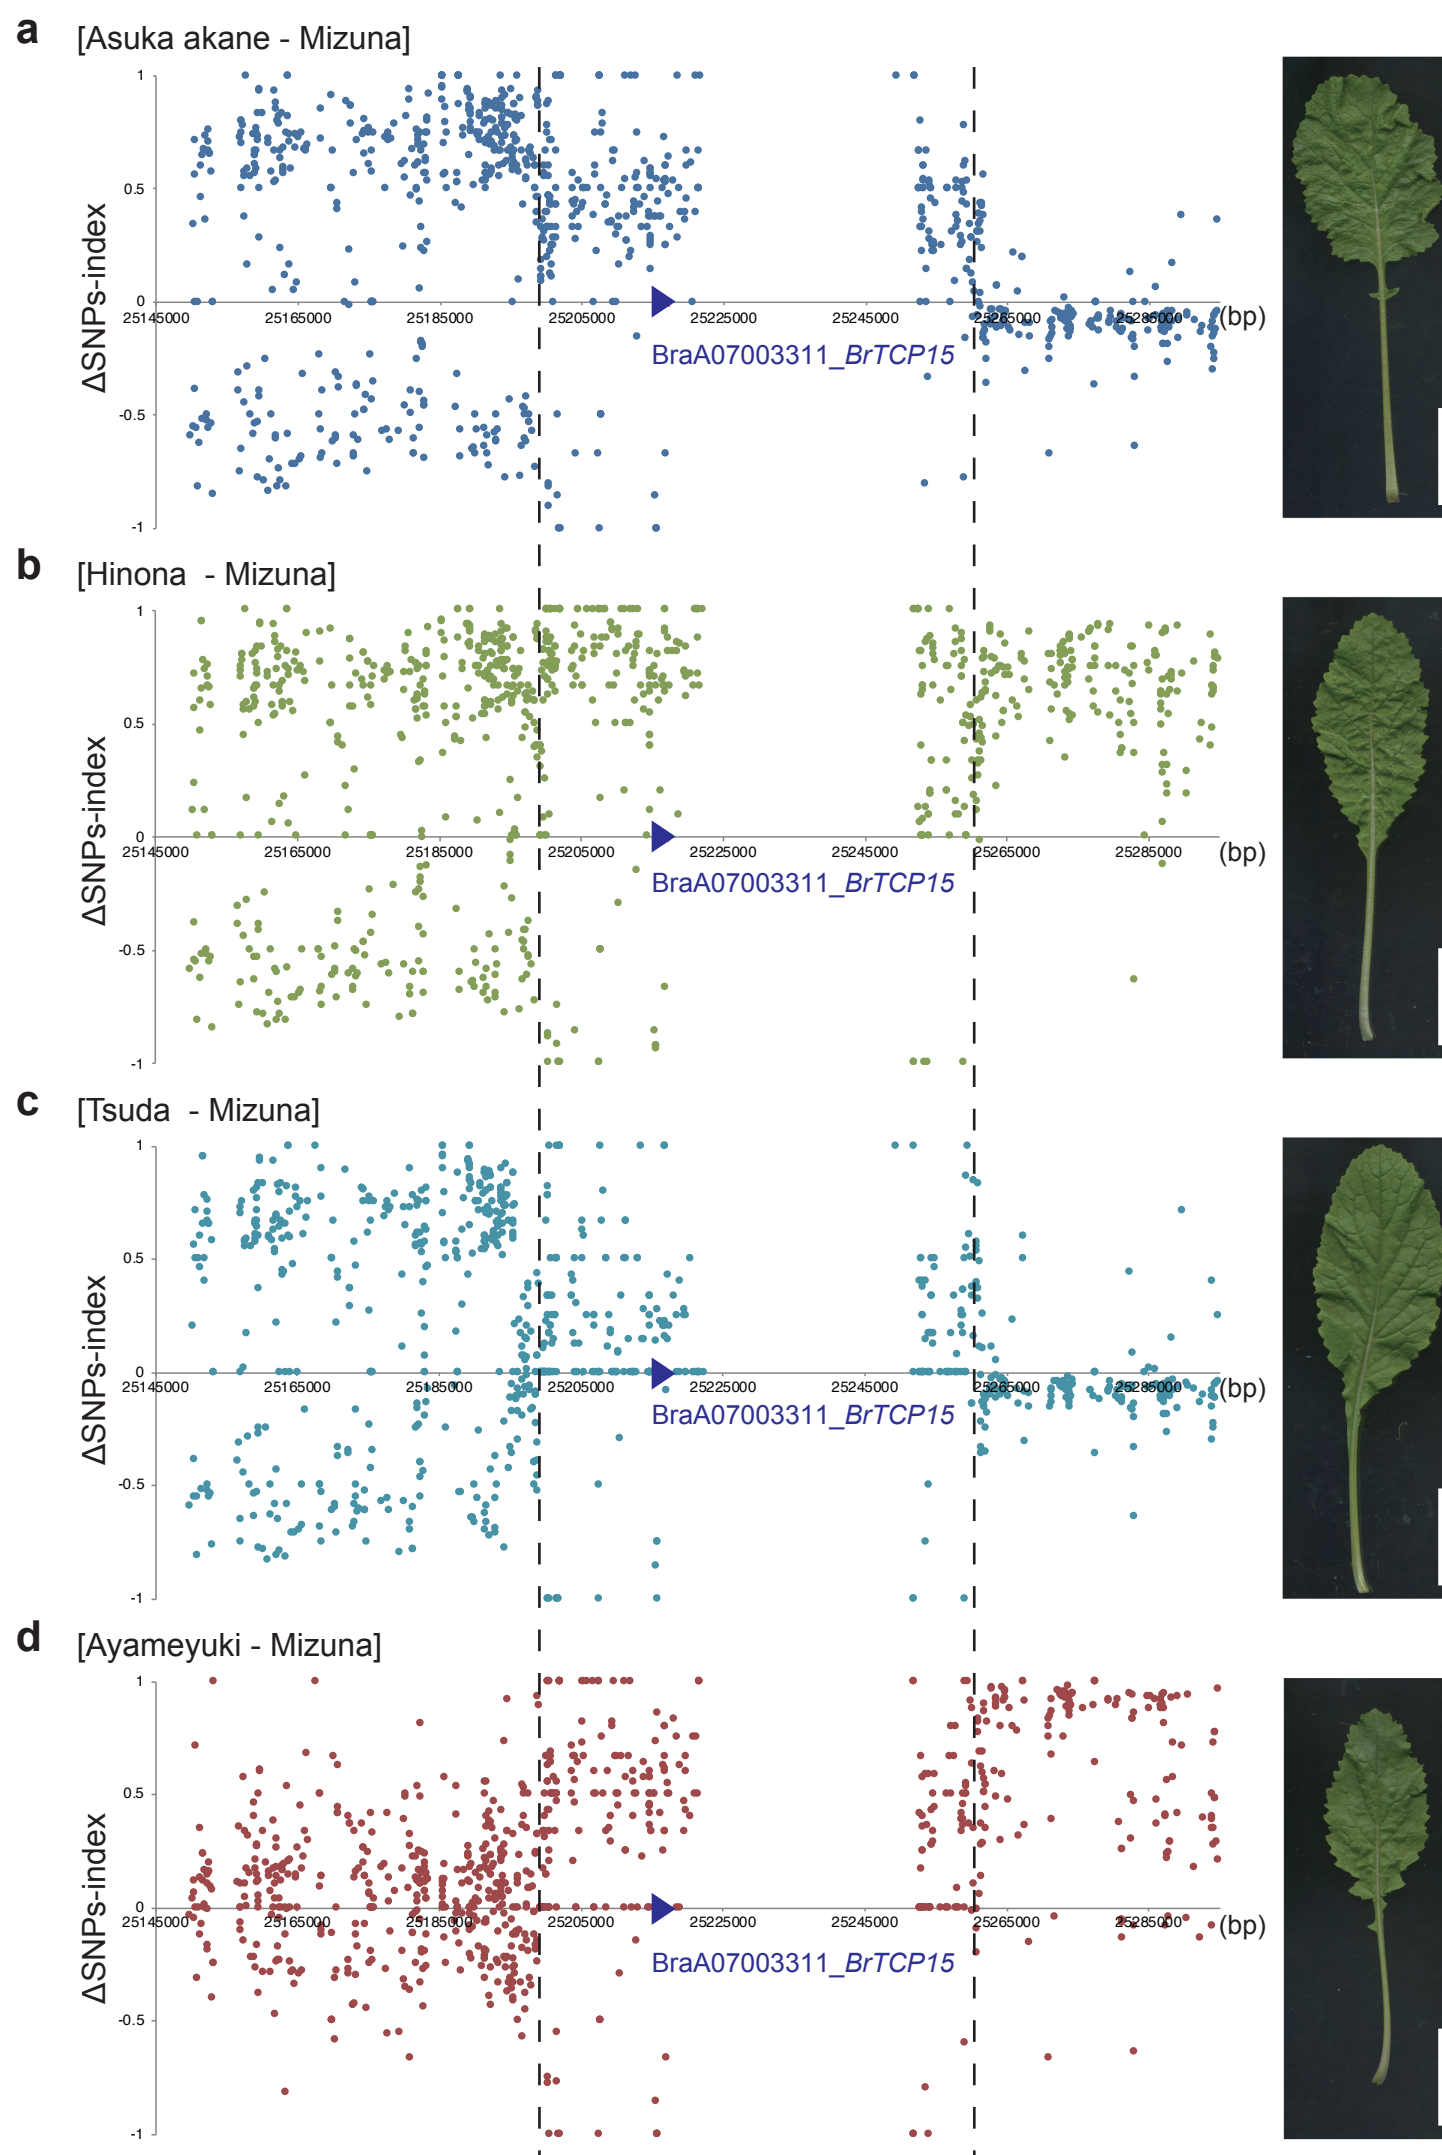

**Supplementary Figure S3 SNPs around *BrTCP15* of other turnips.**

Plot of the  $\Delta$ SNPs-index (Turnips-Mizuna) around *BrTCP15* of **a** Asuka akane, **b** Hinona, **c** Tsuda, and **d** Ayameyuki. The area between the dashed lines in the plot represents the approximately 61 kbp long locus between 25198 and 25259 kbp. The blue triangle in the center indicates *BrTCP15*. The vertical axis represents the  $\Delta$ SNPs-index score, and the horizontal axis represents the position around *BrTCP15* on the chromosome A07 (Mb). Scale bar; 3 cm.

Supplementary Table S1 Results of QTL analysis and these genomic locations

| Genotyping   | Year | Sample number | Phenotype | LG  | Interval*                   | Location (Mb) | LOD score** | Additive effect | Dominance effect | R2 (%) |
|--------------|------|---------------|-----------|-----|-----------------------------|---------------|-------------|-----------------|------------------|--------|
| CAPS markers | 2013 | 96            | Ser       | A06 | BraA06001813M-BraA06003805M | 18.9-32.9     | 5.7         | 0.40            | -0.13            | 8.7    |
|              |      |               |           | A07 | BraA07003270M-BraA07003440M | 25.0-26.0     | 18.1        | 0.73            | -0.26            | 37.9   |
|              |      |               |           | A09 | BraA09003452M-BraA09005859M | 32.0-48.7     | 6.4         | 0.38            | -0.20            | 13.2   |
| RAD-seq      | 2014 | 82            | Ser       | A06 | 18237-17138                 | 19.5-29.7     | 7.6         | 0.46            | -0.41            | 24.7   |
|              |      |               |           | A07 | 14298-13693                 | 18.3-24.7     | 10.0        | 0.57            | -0.23            | 40.3   |

\*Above the LOD threshold

\*\*Scored at the LOD peak

Supplementary Table S2 Genes in QTL on LG A07 and relative expression levels by RNA-seq

| gene_id      | Gene name                 | logFC SAM Mibuna/Mizuna | logFC 1cm Mibuna/Mizuna | logFC 2cm Mibuna/Mizuna | logFC 5cm Mibuna/Mizuna |
|--------------|---------------------------|-------------------------|-------------------------|-------------------------|-------------------------|
| BraA07002927 |                           | -1.091535417            | 0.606914123             | 0.228021264             | -0.401368952            |
| BraA07002928 |                           | -0.139702876            | 0.711049054             | -0.33542626             | -0.207808039            |
| BraA07002929 | AtMYB62,BW62B,BW62C,MYB62 | 0                       | 0                       | 0                       | 0                       |
| BraA07002930 |                           | 0                       | 0                       | 0                       | 0                       |
| BraA07002931 |                           | 0                       | 0                       | 0                       | 0                       |
| BraA07002932 |                           | 0                       | 0                       | 0                       | 0                       |
| BraA07002933 |                           | 1.770081854             | -0.646440094            | -0.149703018            | 0.435473312             |
| BraA07002934 |                           | -0.343600732            | -0.547524366            | -0.321817024            | -0.038832169            |
| BraA07002935 | POLD2                     | 0                       | 0                       | 0                       | 0                       |
| BraA07002936 |                           | 0                       | 0                       | 0                       | 0                       |
| BraA07002937 |                           | -0.355244516            | -0.221456803            | -0.297678989            | -0.257895221            |
| BraA07002938 | AtHDD14,IDD14             | -0.259537248            | 0.2318352               | -0.117812688            | -0.034179623            |
| BraA07002939 | IAR1                      | -0.555672862            | -0.199024956            | -0.199942663            | -0.327701529            |
| BraA07002940 |                           | 0.019204281             | -0.778575731            | -0.615554816            | 0.002932149             |
| BraA07002941 | ATMAP7-1,MAP7-1           | -0.327175004            | -0.022975988            | -0.364222208            | -0.257865604            |
| BraA07002942 | ATTPS6,TPS6               | -0.577618165            | -0.286237176            | -0.491340379            | -0.694860378            |
| BraA07002943 | ATHPR1,HPR                | 1.915486092             | -1.690100137            | -1.237615101            | -1.068545732            |
| BraA07002944 | ATPIS,ATPIS1,PIS1         | -0.4151152              | -0.165640149            | -0.176760536            | -0.30522881             |
| BraA07002945 | ATLOX2,LOX2               | 1.175962079             | 1.00641702              | 1.868168783             | -1.865147592            |
| BraA07002946 | ATLOX2,LOX2               | 0.259064                | 1.367870508             | 2.930880323             | -1.001026106            |
| BraA07002947 | ATLOX2,LOX2               | 0.769176243             | 0.644358409             | 0.321084178             | -0.494823795            |
| BraA07002948 | ATLOX2,LOX2               | 0.549157435             | 1.763565208             | 2.473813864             | 0.873946536             |
| BraA07002949 | AtENODL22,ENODL22         | 0                       | 0                       | 0                       | 0                       |
| BraA07002950 |                           | 0                       | 0                       | 0                       | 0                       |
| BraA07002951 |                           | -1.471811794            | -1.341745006            | -2.366750715            | -2.000524888            |
| BraA07002952 |                           | -2.596443857            | 0.574313357             | -0.162335891            | -8.14168E-05            |
| BraA07002953 |                           | 0.464450641             | 0.039046668             | 0.563659119             | 0.521003666             |
| BraA07002954 |                           | -0.886782604            | -0.570715301            | -0.620455566            | -0.461447843            |
| BraA07002955 |                           | -4.264724758            | 2.034792537             | 0.640646345             | -0.421276298            |
| BraA07002956 |                           | -4.128700734            | 1.166758079             | -0.229824737            | 0.369091754             |
| BraA07002957 | CSK                       | 0.738759156             | 0.139916166             | 0.032495837             | 0.031989637             |
| BraA07002958 | AtRLP12,RLP12             | 0.519479099             | 0.019746534             | 0.184719871             | 0.234225201             |
| BraA07002959 | AGL53                     | 0                       | 0                       | 0                       | 0                       |
| BraA07002960 |                           | 1.141829061             | 0.990440824             | 0.826951748             | 0.759183179             |
| BraA07002961 |                           | -0.276902267            | 1.756273122             | 0.781661397             | 0.122217686             |
| BraA07002962 | PSBY,YCF32                | 1.972695071             | -0.421246366            | -0.157189906            | -0.02408088             |
| BraA07002963 | ARR11                     | -1.385910846            | 0.986514008             | 0.049495509             | -0.420476837            |
| BraA07002964 |                           | 0.877307553             | -0.701304237            | -0.236795518            | -0.177071708            |
| BraA07002965 |                           | 0.923138296             | 0.730089511             | 0.909578596             | 0.913071921             |
| BraA07002966 |                           | 0.024676273             | -0.174953037            | -0.229890199            | 0.209702623             |
| BraA07002967 |                           | -0.916157748            | 0.771827015             | -0.017969175            | 0.556025625             |
| BraA07002968 |                           | 0.280873255             | 0.889994383             | 0.379846249             | -0.011567572            |
| BraA07002969 | ORTH2,VIM1                | -6.45607051             | -5.380010996            | 0                       | -4.459621729            |
| BraA07002970 | ORTH2,VIM1                | 0.13136871              | 0.418048433             | 0.49620621              | 0.540091947             |
| BraA07002971 |                           | 0.438563214             | 0.21215495              | -0.201138111            | -0.267644751            |
| BraA07002972 |                           | 1.539890715             | 1.140214738             | -1.168618107            | 0.629537147             |
| BraA07002973 |                           | 0                       | 0                       | 0                       | 0                       |
| BraA07002974 | ATREV3,REV3               | -0.375559219            | 0.195531809             | 0.102555122             | -0.00402325             |
| BraA07002975 | GCS1,KNF                  | -0.292372692            | -0.111477398            | 0.119830951             | -0.062178382            |
| BraA07002976 |                           | -0.18493848             | 3.349189925             | 2.293218145             | 0                       |
| BraA07002977 |                           | 1.769081276             | 0.475840933             | 0.76979212              | 1.169093748             |
| BraA07002978 |                           | 0.133863236             | 0.512806081             | 0.452920058             | 0.785666913             |
| BraA07002979 |                           | -0.206707626            | -1.332187781            | 0                       | 0                       |
| BraA07002980 |                           | 0                       | 0                       | 0                       | 0                       |
| BraA07002981 |                           | 0.706925656             | 0.868254853             | 0.432271501             | 1.04746146              |
| BraA07002982 |                           | -0.752746985            | -0.541183842            | -0.790419798            | -0.864260299            |
| BraA07002983 |                           | 0                       | 0                       | 0                       | 0                       |
| BraA07002984 |                           | 0                       | 0                       | 0                       | 0                       |
| BraA07002985 |                           | 0                       | 0                       | 0                       | 0                       |
| BraA07002986 |                           | 0                       | 0                       | 10.64678392             | 9.917370889             |
| BraA07002987 |                           | -0.106135314            | 0.313519764             | 0.225514247             | 0.24304408              |
| BraA07002988 |                           | 0                       | -0.574420696            | 2.172237305             | 0                       |
| BraA07002989 |                           | 0.145838984             | 0.305542199             | 0.366928702             | 0.293958276             |
| BraA07002990 |                           | -0.628156225            | 0.220031292             | -0.157833166            | -0.3613471              |
| BraA07002991 | TCP1                      | 0                       | 2.126431457             | 0                       | 0                       |
| BraA07002992 |                           | 2.271215797             | 0.77142688              | 0.727490442             | 0.744420851             |
| BraA07002993 | ATHPCAT1,HAC2,HAC2        | 0                       | 0                       | 0                       | 0                       |

|              |                      |              |              |              |              |
|--------------|----------------------|--------------|--------------|--------------|--------------|
| BraA07002994 |                      | -2.008658665 | -1.812010797 | -2.091554233 | -1.950424161 |
| BraA07002995 | ATHPCAT1,HAC2,HAC2   | 0            | 0            | 0            | 0            |
| BraA07002996 |                      | -0.130323481 | 0.189168021  | 0.125327028  | -0.012757257 |
| BraA07002997 | GPDL2,MRH5,SHV3      | -1.356247186 | -1.370434519 | -1.211588524 | -0.500807576 |
| BraA07002998 | ATBRXL2,BRX-LIKE2    | 0            | 0            | -0.001859534 | 0            |
| BraA07002999 |                      | 0            | 0            | 0            | 0            |
| BraA07003000 | ECT3                 | 0.280360426  | -0.028857817 | 0.207930493  | 0.009740455  |
| BraA07003001 | ATDSS1(I),DSS1(I)    | 0.113118733  | -0.723272973 | -0.433557604 | -0.293522672 |
| BraA07003002 |                      | -0.026824937 | -0.0639472   | -0.023099803 | -0.265933925 |
| BraA07003003 |                      | 0.528531212  | -0.075263692 | 0.518529995  | 0.587088099  |
| BraA07003004 |                      | -5.462907092 | -3.777558927 | 0            | -2.486834312 |
| BraA07003005 |                      | 0            | -2.273401653 | -3.012603455 | 0            |
| BraA07003006 | 4CL3                 | 1.623644742  | 0.016019098  | 0.517066396  | 0.25868061   |
| BraA07003007 | mtACP2               | 0.17844102   | 0.669385141  | 0.849008769  | 0.783460768  |
| BraA07003008 |                      | 0            | 0            | 0            | 0            |
| BraA07003009 |                      | 0.9785495    | 0.712378944  | 0.992130481  | 0.619346549  |
| BraA07003010 |                      | 0.876478114  | 0.579431965  | 0.6154969    | 0.397341012  |
| BraA07003011 | GTB1                 | 0.371490173  | 0.481363485  | 0.310640339  | 0.111675891  |
| BraA07003012 |                      | 0            | 2.136315352  | 0            | 0            |
| BraA07003013 | FAS1,NFB2            | 0.280216413  | 0.410689277  | 0.532058896  | 0.327644001  |
| BraA07003014 | TSF                  | 0            | 0            | 0            | 0            |
| BraA07003015 | TSF                  | 0            | 0            | 0            | 0            |
| BraA07003016 |                      | -0.129211281 | -0.072464102 | -0.138917836 | -0.149113125 |
| BraA07003017 |                      | 0            | 0            | 0            | 0            |
| BraA07003018 | FRA3                 | -0.276519667 | -0.036003975 | -0.159007488 | -0.280745311 |
| BraA07003019 | ATHEX1,HEXO3         | 1.589950788  | 0.990851531  | 1.135993863  | 1.054992179  |
| BraA07003020 | DegP3                | 0            | 0            | 0            | 0            |
| BraA07003021 | UCH2                 | 0.29329346   | 0.330523251  | 0.407463456  | 0.208676357  |
| BraA07003022 |                      | 0.023727759  | -0.281567606 | 0.054844047  | 0.028869617  |
| BraA07003023 | ARF8,ATARF8          | 0.151920257  | 0.555695984  | 0.13666438   | 0.374030197  |
| BraA07003024 |                      | -1.336504611 | -0.565696427 | -0.706290705 | -0.824077671 |
| BraA07003025 | YSL7                 | -1.076671415 | -0.314098297 | -0.340784696 | -0.653953716 |
| BraA07003026 |                      | -1.244025258 | -0.848436074 | -1.598805202 | -1.619793147 |
| BraA07003027 | BZO1                 | 0            | -0.42391998  | 0            | 0            |
| BraA07003028 |                      | 0.590716298  | 0.971569421  | 0.859075917  | 0.656082918  |
| BraA07003029 | clCDH                | 0.026931464  | 0.259927798  | 0.09684397   | -0.096903419 |
| BraA07003030 |                      | -0.989075603 | -0.240739828 | -0.272158514 | -0.498880036 |
| BraA07003031 | GAD2                 | -4.119281411 | -0.852612386 | -1.477089988 | -2.477526768 |
| BraA07003032 | GAD2                 | -4.876187588 | -1.553584235 | -1.737804835 | -2.601045908 |
| BraA07003033 | TPX1                 | -0.586392432 | 0.990304251  | 0.339205402  | 0.989200005  |
| BraA07003034 | TPX1                 | 0.877805119  | 1.649651201  | 0.721917438  | 1.027913298  |
| BraA07003035 |                      | 0.390147054  | -0.034459821 | 0.480659356  | 0.235631662  |
| BraA07003036 |                      | 0.076565448  | 0.258049295  | 0.577659088  | 0.42613066   |
| BraA07003037 |                      | 0            | 0            | 0            | 0            |
| BraA07003038 |                      | 0.384445323  | 0.165785183  | 0.487192864  | 0.449484544  |
| BraA07003039 |                      | 0.969234463  | 0.707042385  | 1.233176305  | 1.54067532   |
| BraA07003040 |                      | 0.314182247  | 0.065086639  | 2.058237178  | -0.035901805 |
| BraA07003041 |                      | 0            | 0            | 0            | 0            |
| BraA07003042 |                      | 1.198247159  | -0.158948832 | 0.09899115   | 0.441762897  |
| BraA07003043 | ZFP4                 | -5.70009583  | -0.34688136  | -1.276891002 | -0.74247195  |
| BraA07003044 | TMK1                 | 0.377456828  | -0.006574235 | -0.295440498 | -0.268739337 |
| BraA07003045 |                      | 0            | 0            | 0            | 0            |
| BraA07003046 |                      | 0            | 0            | 0            | 0            |
| BraA07003047 | AtMYB2,MYB2          | -0.81924714  | 0.058323858  | -0.070389057 | -1.285769385 |
| BraA07003048 |                      | 0            | 0            | 0            | 0            |
| BraA07003049 |                      | 0            | 0            | 0            | 0            |
| BraA07003050 |                      | 0.101667791  | 0.106607873  | -0.029435231 | 0.065649074  |
| BraA07003051 | AtETR1,EIN1,ETR,ETR1 | -0.346066673 | 0.322798834  | -0.088412054 | -0.219627233 |
| BraA07003052 |                      | -1.421952154 | -0.191991431 | 0.629021012  | 3.390256042  |
| BraA07003053 |                      | 0            | 0            | 0            | 0            |
| BraA07003054 |                      | 0            | 0            | 0            | 0            |
| BraA07003055 | ATMYB9,MYB9,PAP2     | 0            | 0            | 0            | 0            |
| BraA07003056 | ATMYB9,MYB9,PAP2     | 0            | 0            | 0            | 0            |
| BraA07003057 |                      | 0            | 0            | 0            | 0            |
| BraA07003058 |                      | 0            | 0            | 0            | 0            |
| BraA07003059 | CML23                | -0.685433661 | -0.528657158 | -0.671836651 | -0.410914628 |
| BraA07003060 | ACAM-4,CAM4          | -1.349827315 | -0.341492477 | -0.569742687 | -0.63476276  |
| BraA07003061 |                      | -1.913076288 | 0.55225414   | -1.143568961 | -1.333761598 |
| BraA07003062 |                      | 1.334583527  | 0.282485872  | 0.451684763  | 0.520008641  |

|              |                            |              |              |              |              |
|--------------|----------------------------|--------------|--------------|--------------|--------------|
| BraA07003063 | RHD6                       | 0            | 0            | 0            | 0            |
| BraA07003064 | RHD6                       | 0            | 0            | 0            | 0            |
| BraA07003065 |                            | 2.275277226  | 1.194680897  | 0.875391133  | 0.728503213  |
| BraA07003066 | PMI2                       | -2.55024201  | -1.127233983 | -1.996550662 | -2.102144053 |
| BraA07003067 |                            | -2.304851517 | -1.24490195  | -1.559648744 | -0.669578942 |
| BraA07003068 |                            | -0.348675054 | -0.6835825   | -0.668742454 | -0.855672467 |
| BraA07003069 | pde194                     | 0.728795066  | -0.310556518 | -0.022563766 | 0.302853723  |
| BraA07003070 |                            | -0.055009512 | -0.064025296 | 0.555400989  | 0.623735137  |
| BraA07003071 | PXMT1                      | 0            | -1.489348548 | 1.013031672  | 0.7695577    |
| BraA07003072 |                            | 0            | 0            | 0            | 0            |
| BraA07003073 | CLPP3,NCLPP3               | 1.125737659  | -0.392093199 | 0.064330206  | 0.239573076  |
| BraA07003074 | AR41                       | 0.11733744   | 0.011434871  | 0.218611251  | 0.166194058  |
| BraA07003075 |                            | 0            | 0            | 0            | 0            |
| BraA07003076 | ARK3,RK3                   | 0            | 0            | 0            | 0            |
| BraA07003077 |                            | 0            | 0            | 0            | 0            |
| BraA07003078 |                            | 0            | 0            | 0            | 0            |
| BraA07003079 |                            | 1.604467362  | 0.89432967   | 0.346518835  | 1.726270841  |
| BraA07003080 |                            | 0            | 0            | 0            | 0            |
| BraA07003081 | PXMT1                      | 0            | 0            | 0            | 0            |
| BraA07003082 |                            | 0            | 0            | 0            | 0            |
| BraA07003083 | PXMT1                      | 0            | 0            | 0            | 0            |
| BraA07003084 | AtLIG6,LIG6                | -1.978340404 | -1.616150361 | -1.657079219 | -1.881860758 |
| BraA07003085 | ASF1A,AtSP7,SGA2,SP7       | 0.141324696  | 0.161221162  | 0.361026127  | 0.294400525  |
| BraA07003086 |                            | -0.114712618 | -0.199090461 | -0.05095504  | -0.125998503 |
| BraA07003087 |                            | -3.969236905 | -4.453683318 | -5.220977041 | -4.508390234 |
| BraA07003088 |                            | -1.718773917 | -0.482505979 | -0.367275239 | -0.271577016 |
| BraA07003089 |                            | -1.712144334 | -0.324311975 | -0.797308256 | -0.121752353 |
| BraA07003090 |                            | -2.82108998  | -3.412294854 | -2.872343526 | -2.320273775 |
| BraA07003091 |                            | -4.072204863 | -0.946905393 | -0.94415619  | -1.717143146 |
| BraA07003092 |                            | -1.032084829 | -2.013052697 | -1.899313328 | -1.399954509 |
| BraA07003093 |                            | 0            | 0            | 0            | 0            |
| BraA07003094 |                            | -2.121219143 | -1.849176411 | -2.485376581 | -1.775223443 |
| BraA07003095 |                            | -2.072985272 | -1.764076469 | -2.068683699 | -2.24916127  |
| BraA07003096 |                            | 0            | -2.946712792 | 0            | 0            |
| BraA07003097 |                            | 0.23731668   | -0.352292014 | -0.515182264 | -0.122883579 |
| BraA07003098 |                            | 0            | 0            | 0            | 0            |
| BraA07003099 |                            | 0            | 0            | 0.18197959   | 0            |
| BraA07003100 |                            | -0.196479526 | 0.432375412  | -0.798050474 | -1.711405029 |
| BraA07003101 | ZFP6                       | -3.660242414 | 0.458934413  | -0.315984052 | -0.862475681 |
| BraA07003102 | ATBX3,ATBXL3,BX3,BXL3,XYL3 | 0            | -0.538833457 | 0            | 0            |
| BraA07003103 |                            | -1.614883655 | -2.848261043 | -2.564414255 | -2.247323207 |
| BraA07003104 |                            | -1.293774746 | -0.500414248 | -0.788587993 | 0.092641603  |
| BraA07003105 |                            | 0            | 0            | 0            | 0            |
| BraA07003106 |                            | 0            | 0            | 0            | 0            |
| BraA07003107 | SWEETIE                    | 0.166734157  | 0.227674159  | -0.117009563 | -0.227503801 |
| BraA07003108 |                            | -0.403514516 | -0.264229825 | -0.069344097 | -0.296029815 |
| BraA07003109 |                            | -0.368688813 | -0.361231031 | -0.126698191 | -0.137398065 |
| BraA07003110 |                            | -0.352770519 | -0.613382153 | -0.487447122 | -0.270149074 |
| BraA07003111 | TCP1                       | -2.191849095 | 2.036304258  | 0            | 0            |
| BraA07003112 |                            | 0.721522095  | 0.505487097  | 0.638691788  | 0.567059451  |
| BraA07003113 |                            | 0            | 0            | 0            | 0            |
| BraA07003114 |                            | 0.838523674  | -0.485818085 | -0.10159041  | -0.3135548   |
| BraA07003115 |                            | -0.029595068 | 3.298602058  | 0.320746792  | -1.220475433 |
| BraA07003116 |                            | -0.477118874 | -0.024457688 | 0.027461543  | 0.043801136  |
| BraA07003117 |                            | 0.322003164  | 0.950577551  | 0.952442795  | 1.154135536  |
| BraA07003118 |                            | -0.922090953 | -0.823433086 | -0.645882084 | -0.554702031 |
| BraA07003119 |                            | 0            | 0            | 0            | 0            |
| BraA07003120 |                            | -0.433053056 | -0.008677928 | -0.132675209 | -0.091079817 |
| BraA07003121 |                            | 0.689610253  | 0.020416234  | 0.031369462  | 0.033784137  |
| BraA07003122 | ASY1,ATASY1                | -0.490827432 | 0.917899436  | 0.857565576  | 0.32012361   |
| BraA07003123 |                            | 0.016055429  | 0.163259496  | -0.334983126 | -0.239770927 |
| BraA07003124 |                            | 0            | 0            | 0            | 0            |
| BraA07003125 |                            | 0.539478203  | -0.38564138  | -0.077153168 | 0.156563535  |
| BraA07003126 | emb1688                    | -0.106601431 | -0.671847011 | -0.403230076 | -0.651428827 |
| BraA07003127 |                            | -0.753666307 | 0.39047499   | 0.31529017   | -0.131631219 |
| BraA07003128 |                            | -0.606177004 | 0            | -0.482459396 | 0.347169521  |
| BraA07003129 |                            | 0.770260948  | 0.526103068  | 0.738139955  | 0.317701049  |
| BraA07003130 |                            | 0            | 0            | 0            | 0            |
| BraA07003131 |                            | 0.681137083  | -0.051102229 | -0.054198013 | 0.039263903  |

|              |                           |              |              |              |              |
|--------------|---------------------------|--------------|--------------|--------------|--------------|
| BraA07003132 |                           | 0.546067878  | 0.129162446  | 0.69887721   | 0.527976805  |
| BraA07003133 |                           | 0            | 0            | 0            | 0            |
| BraA07003134 |                           | 0            | 0            | 0            | 0            |
| BraA07003135 |                           | 0            | 0            | -0.061333817 | -0.559903754 |
| BraA07003136 |                           | -0.50497837  | -0.103243735 | -0.103139629 | -0.843374725 |
| BraA07003137 |                           | 0.272839068  | 0.185537063  | 0.18146074   | -0.000192902 |
| BraA07003138 |                           | -0.342266655 | -0.413115897 | -0.433760785 | 0.4716235    |
| BraA07003139 |                           | -0.394135448 | 1.96253805   | 0.722442548  | 1.998850006  |
| BraA07003140 |                           | 0.975822216  | 0.55297656   | 0.656013873  | 0.37399705   |
| BraA07003141 |                           | 0.906656685  | -0.925173204 | -0.480137796 | -0.456697509 |
| BraA07003142 |                           | 0            | 0            | 0            | 0            |
| BraA07003143 |                           | -0.576410429 | -0.623701297 | -0.414911928 | -0.613260032 |
| BraA07003144 |                           | 0.766247508  | -0.321612382 | -0.07262735  | 0.027091202  |
| BraA07003145 | ARR11                     | -3.559579498 | -0.979471333 | -1.555205338 | -0.785845951 |
| BraA07003146 |                           | -0.473180764 | 2.590255939  | 0.661011386  | -1.588614749 |
| BraA07003147 | FTSH5,VAR1                | 0.64707027   | -0.626595984 | -0.438232516 | -0.571789293 |
| BraA07003148 |                           | -0.276109213 | 0.74989458   | 0.442600061  | 0.479427065  |
| BraA07003149 |                           | 0.203047654  | -1.35761432  | -0.976239484 | -0.073613273 |
| BraA07003150 | ATKCR1,KCR1,YBR159        | 0.115049794  | -0.282551395 | -0.422767429 | -0.581708991 |
| BraA07003151 | PSBY,YCF32                | 1.202199824  | -0.480011996 | -0.041283005 | 0.103669153  |
| BraA07003152 |                           | -1.174001764 | -0.143938905 | -0.667084633 | -0.294509412 |
| BraA07003153 |                           | -0.170875731 | 1.221599041  | -0.083942543 | -0.570856486 |
| BraA07003154 | TEL2                      | -4.591365576 | 0            | 0            | 0            |
| BraA07003155 |                           | -0.108218654 | -0.242235148 | -0.011738859 | 0.325127651  |
| BraA07003156 | SDG17,SUVH7               | 0            | 0            | 0            | 0            |
| BraA07003157 |                           | -1.264480683 | 0.900670372  | 0.871951109  | -0.206406126 |
| BraA07003158 |                           | -0.540405767 | -0.647469922 | -0.744542112 | -0.794326864 |
| BraA07003159 | SUFE2                     | 0            | 0            | 0            | 0            |
| BraA07003160 |                           | 0            | 0            | 0            | 0            |
| BraA07003161 | ATFXG1,FXG1               | 0.600538059  | 0.138137801  | 0.319051001  | 0.401119685  |
| BraA07003162 |                           | 0            | 0            | 0            | 0            |
| BraA07003163 |                           | 0            | 0            | 0            | -1.478181462 |
| BraA07003164 |                           | -8.857167391 | -3.649734067 | -5.092559535 | -6.499303646 |
| BraA07003165 |                           | -1.167655399 | -0.083868817 | -0.727708257 | -1.12160468  |
| BraA07003166 |                           | -0.462501575 | -0.053816905 | -0.207934148 | -0.158539183 |
| BraA07003167 |                           | -0.646535676 | -0.662403824 | -0.809062877 | -0.715400003 |
| BraA07003168 | ATNAP3,AtSTAR1,NAP3       | -1.804420332 | -2.605346982 | -2.742514316 | -2.992816748 |
| BraA07003169 | AT-HSFA8,HSFA8            | -0.796673111 | -0.829559345 | -1.141183114 | -1.080570009 |
| BraA07003170 | CCOAMT                    | 0            | 0            | 0            | 0            |
| BraA07003171 | ATPIS,ATPIS1,PIS1         | 0.563140793  | 0.613618495  | 0.802769072  | 0.769500912  |
| BraA07003172 | ATHPR1,HPR                | 0.286677019  | -1.795890701 | -1.637129839 | -1.55951582  |
| BraA07003173 |                           | -0.283905955 | -0.194204067 | -0.080358451 | 0.346500352  |
| BraA07003174 |                           | 0            | 0            | -2.888853218 | 0            |
| BraA07003175 |                           | 0            | 0            | 0            | 0            |
| BraA07003176 | ATMAP7-1,MAP7-1           | -0.103327428 | -0.166388508 | -0.197610363 | -0.29314528  |
| BraA07003177 |                           | -0.247315592 | -0.321957845 | -0.280669068 | -0.136406248 |
| BraA07003178 | IAR1                      | 0.557128821  | 0.4471724    | 0.40432314   | 0.382808768  |
| BraA07003179 |                           | -0.238244991 | -0.077290043 | -0.841045885 | -1.069100784 |
| BraA07003180 | AtIDD14,IDD14             | -0.146156575 | 0.886443793  | -0.192201194 | -0.33073938  |
| BraA07003181 |                           | 0.064193871  | -0.043118412 | 0.002237484  | 0.01376066   |
| BraA07003182 | ATWRKY9,WRKY9             | -3.411401772 | 0            | 0.456322919  | 0.816254813  |
| BraA07003183 |                           | 0.3798884    | 0.553977044  | 0.458478196  | 0.578693338  |
| BraA07003184 |                           | -0.513685654 | 0.160367134  | -1.116735474 | -1.28855247  |
| BraA07003185 |                           | -0.027340154 | 0.575227518  | -0.736723604 | 0.777010437  |
| BraA07003186 | APRR6,PRR6                | 0.530257968  | 0            | -1.803979288 | 0            |
| BraA07003187 |                           | -0.266287842 | -0.238153527 | -0.580039211 | -0.640142318 |
| BraA07003188 |                           | -2.617471384 | -1.730034    | -2.050319939 | -3.740453628 |
| BraA07003189 |                           | -0.946256663 | -0.166381751 | -0.198336328 | -0.38360649  |
| BraA07003190 |                           | 0.901069657  | -0.632744688 | 0.043356756  | 0.009895418  |
| BraA07003191 | ENDO 2                    | 0.615272522  | 0.329149855  | 2.282231805  | 0.334353911  |
| BraA07003192 |                           | -0.041157145 | 0.231120413  | 0.051227058  | -0.025760798 |
| BraA07003193 |                           | 1.643705781  | 0.333855533  | 0.255686305  | -0.170217714 |
| BraA07003194 | AtMYB62,BW62B,BW62C,MYB62 | 0            | 0            | 0            | 0            |
| BraA07003195 |                           | -0.908764311 | 0.910925686  | -0.115502767 | -0.003522951 |
| BraA07003196 |                           | -0.029665461 | 1.322794919  | -0.621264009 | 1.138358455  |
| BraA07003197 |                           | -1.750240082 | 0.507319654  | -0.272964227 | 0.200991253  |
| BraA07003198 | ARG1                      | 0.226297207  | 0.116809523  | 0.297812374  | 0.124151532  |
| BraA07003199 |                           | 0            | 0            | 0            | 0            |
| BraA07003200 |                           | -0.888018335 | 0.402024207  | 0.25168643   | -0.626497889 |



|              |                  |              |              |              |              |
|--------------|------------------|--------------|--------------|--------------|--------------|
| BraA07003201 | APRR6,PRR6       | 0            | 0            | 0            | 0            |
| BraA07003202 | ATNDT2,NDT2      | -0.841964001 | 0.905721413  | 1.227593024  | 0.106781039  |
| BraA07003203 |                  | -0.646998654 | 0.307351535  | 0.320777473  | 0.235015154  |
| BraA07003204 |                  | -0.607549493 | -0.216186569 | -0.564066892 | -1.388834192 |
| BraA07003205 |                  | 2.070128142  | 1.558192925  | 1.682472288  | 2.368695461  |
| BraA07003206 | JAG              | 0.781778734  | 1.209048251  | 2.33171954   | 3.276204485  |
| BraA07003207 |                  | 0.279252156  | -0.001167572 | -0.149017975 | -0.377926439 |
| BraA07003208 |                  | 0.701017001  | -1.392980566 | -0.519344363 | -1.461544316 |
| BraA07003209 | LBD42            | 0            | 0            | 0            | 0            |
| BraA07003210 |                  | 0            | 0            | 0            | 0            |
| BraA07003211 |                  | 0.046948651  | -0.094282185 | 0.150127712  | 0.550409967  |
| BraA07003212 | ATXYL1,TRG1,XYL1 | 0.182109838  | -0.489149785 | -0.069898792 | -0.317198759 |
| BraA07003213 |                  | -3.234821795 | -4.061532227 | -2.848453914 | -3.207279265 |
| BraA07003214 |                  | 1.115910634  | 0.166681158  | 0.474008319  | 0.762617148  |
| BraA07003215 |                  | -0.079087564 | 0.658794407  | 1.350171739  | 0.513374084  |
| BraA07003216 |                  | 0.187810159  | 0.334307225  | 0.237383542  | 0.437303539  |
| BraA07003217 |                  | 1.794528251  | -1.052974936 | -0.191640294 | -0.042408428 |
| BraA07003218 |                  | -0.232827834 | -1.367230497 | -0.329291852 | 0.190287738  |
| BraA07003219 | PCR11            | 0            | 0            | 0            | 0            |
| BraA07003220 |                  | 0            | -1.42391998  | 0            | -1.927492654 |
| BraA07003221 |                  | 0            | 0            | 0            | 0            |
| BraA07003222 | PAN              | -0.074382985 | 0.522508487  | 1.310262797  | 1.609015287  |
| BraA07003223 |                  | 0.206095305  | -0.150111356 | 0.358316328  | 0.161456081  |
| BraA07003224 |                  | -0.608750193 | 0.027260711  | 0.23530095   | -0.755286908 |
| BraA07003225 |                  | 5.151517626  | 4.475619967  | 5.712441533  | 6.639624576  |
| BraA07003226 |                  | 0.163433312  | 1.119597536  | 0.776742597  | -0.065536146 |
| BraA07003227 |                  | -0.29351857  | 0.154589791  | 0.048917818  | 0.212897579  |
| BraA07003228 |                  | 0.195230074  | -0.26736661  | -0.376092448 | -0.487795904 |
| BraA07003229 |                  | -1.09333706  | 0.680300954  | -0.018352478 | 0.134989243  |
| BraA07003230 |                  | -0.177760049 | -0.901689506 | -0.543233267 | -0.125239696 |
| BraA07003231 | PHO1;H1          | -1.991603632 | 1.228106878  | 0.884435511  | 0.58096508   |
| BraA07003232 | IDA              | 0            | 0            | 0            | 0            |
| BraA07003233 |                  | 1.810105086  | -0.211716086 | -0.012783912 | 0.180415181  |
| BraA07003234 | CLE12            | -1.222949991 | 2.227191343  | 0.045536864  | -0.265484141 |
| BraA07003235 |                  | 0.431547624  | 0.407788788  | 0.113051319  | 0.075466902  |
| BraA07003236 |                  | -0.813741332 | -0.300842889 | -0.281446208 | -0.329717747 |
| BraA07003237 | STN7             | 0.286935283  | -0.646999327 | -0.636139678 | -0.676317177 |
| BraA07003238 | SSP              | 0            | 0            | 0            | 0            |
| BraA07003239 |                  | 0            | 0            | 0            | 0            |
| BraA07003240 |                  | 0            | 0            | 0            | 0            |
| BraA07003241 | ATSOFL2,SOFL2    | 0.865388528  | -1.270704943 | 0.739921106  | 1.206313191  |
| BraA07003242 |                  | 0            | 0            | 0            | 5.920535764  |
| BraA07003243 |                  | 0            | 0            | 0            | 0            |
| BraA07003244 |                  | 0            | 0.526199824  | 0            | -0.619569347 |
| BraA07003245 | WIT2             | 0            | 0            | 0            | 0            |
| BraA07003246 | WIT2             | -0.213790744 | -0.097187884 | -0.134068816 | -0.684128605 |
| BraA07003247 |                  | -0.871664319 | -0.79255156  | -0.863058117 | -1.111722875 |
| BraA07003248 |                  | -0.280814949 | -0.425472901 | -1.363849225 | -1.143031686 |
| BraA07003249 |                  | -7.254708438 | -2.604451105 | -4.046235414 | -4.440188406 |
| BraA07003250 |                  | 0            | 0            | 0            | 0            |
| BraA07003251 |                  | 0            | 0            | 0            | 0            |
| BraA07003252 | MGP3             | 0.157480564  | 0.087961868  | 0.171250507  | -0.225642856 |
| BraA07003253 | BIM2             | 0.588313291  | 0.281623782  | 0.521239362  | 0.425870673  |
| BraA07003254 |                  | -1.18973137  | -0.725444923 | -0.517272159 | -0.742924282 |
| BraA07003255 | ACR4             | 0.215754822  | -0.568334974 | -0.211955033 | -0.411332878 |
| BraA07003256 |                  | -0.701874927 | 0.594517562  | 0.467287397  | 0.676557703  |
| BraA07003257 |                  | -0.596693227 | -0.469945774 | -0.56443393  | -0.638121543 |
| BraA07003258 |                  | 1.149146508  | -0.181508951 | -0.164674497 | 0.011034641  |
| BraA07003259 |                  | 0            | 0            | 0            | 1.621794751  |
| BraA07003260 | AGL7,AP1         | 0            | 0            | 0            | 0            |
| BraA07003261 |                  | 1.446087626  | 0.146789412  | 0.353031631  | 0.198496224  |
| BraA07003262 |                  | -0.362646297 | -0.003888223 | 0.018522506  | 0.165098762  |
| BraA07003263 | CRC              | 0.058658791  | 1.421466192  | 3.821212459  | 1.856416405  |
| BraA07003264 |                  | 0            | 0            | 0            | 0            |
| BraA07003265 | FLN2             | 1.117309461  | -0.610860369 | -0.026796066 | 0.12456844   |
| BraA07003266 | SIK1             | -0.236105897 | -0.124680406 | -0.221893266 | -0.256115213 |
| BraA07003267 |                  | 0.101224521  | -0.046365269 | 0.341607931  | 0.142695294  |
| BraA07003268 | AFP1             | 0            | 0            | 0            | 0            |
| BraA07003269 | RPK1             | 0            | 0            | 0            | 0            |

|              |                             |              |              |              |              |
|--------------|-----------------------------|--------------|--------------|--------------|--------------|
| BraA07003270 |                             | -0.478588084 | -0.014686758 | 0.08456409   | 0.169813267  |
| BraA07003271 | ATWRKY57,WRKY57             | 0.304226574  | 2.877979705  | 4.016458239  | 1.453062995  |
| BraA07003272 | CLE1                        | 1.153977012  | -2.245215962 | -0.603464198 | -0.641608757 |
| BraA07003273 |                             | -1.335686662 | -0.28816119  | -1.4843648   | -1.228983528 |
| BraA07003274 |                             | -0.491833762 | 0.154550456  | 0.20079489   | 0.362862883  |
| BraA07003275 |                             | -0.126503717 | -0.106777952 | -0.0747777   | 0.013979095  |
| BraA07003276 |                             | -0.048753505 | -0.425951041 | -0.542043817 | -0.15301405  |
| BraA07003277 | cm-3,CM3                    | 0.561872405  | 0.525210384  | 1.62238405   | 1.080576127  |
| BraA07003278 |                             | 0.426176501  | -0.255211733 | -0.061692218 | -0.038569564 |
| BraA07003279 | ARC12,ATMINE1,MINE1         | 0.861108101  | -0.312368389 | 0.038201064  | 0.203516819  |
| BraA07003280 | ATELF5A-3,ELF5A-3           | -2.158345668 | -0.214082764 | -0.445615343 | -0.54622332  |
| BraA07003281 |                             | 0            | 0            | 0            | 0            |
| BraA07003282 |                             | 0            | 0            | 0            | 0            |
| BraA07003283 |                             | 0.142282274  | -0.306464329 | -0.015640157 | 0.302416381  |
| BraA07003284 |                             | 0.776233525  | 0.048365518  | -0.028050007 | 0.292563107  |
| BraA07003285 |                             | -0.033684793 | -0.003647734 | 0.140771938  | 0.073330474  |
| BraA07003286 |                             | -1.843239296 | 0            | 0            | 0            |
| BraA07003287 |                             | 0.303592499  | 0.55609278   | 1.157457599  | 0.970073309  |
| BraA07003288 | ANAC29,ATNAP,NAP            | 1.626892887  | 0            | 2.821134905  | 2.55465453   |
| BraA07003289 | CYP74B1                     | 0            | 0            | 0            | 0            |
| BraA07003290 |                             | -0.201836665 | 0.042750973  | 0.152713652  | 0.206129814  |
| BraA07003291 | DRM1                        | -1.749147321 | -0.204995225 | -0.232697666 | -0.137996273 |
| BraA07003292 |                             | -1.267702816 | -1.294940222 | -1.328368631 | -0.992533126 |
| BraA07003293 |                             | 0            | 0            | 0            | 0            |
| BraA07003294 | AT-EXP1,ATEXP1,ATEXPA1,ATHE | -0.480557263 | -1.049806624 | -0.209708984 | 0.052770864  |
| BraA07003295 | AGL94                       | -0.169809027 | -0.324840867 | -2.137171571 | -1.412656728 |
| BraA07003296 | ATMYB15,LOF2,MYB15          | -1.57559942  | 0.695087379  | -0.2584281   | 0            |
| BraA07003297 | CARA                        | 0.876566586  | 0.094042285  | 0.447446369  | 0.306962324  |
| BraA07003298 |                             | 1.748483978  | 1.694924223  | 3.155127278  | 1.155065828  |
| BraA07003299 |                             | -0.328833076 | 0.76500836   | -0.035685826 | -0.166040919 |
| BraA07003300 | CLE45                       | -1.24948885  | 0.122585654  | 0.236069426  | -0.832757995 |
| BraA07003301 |                             | 0            | 0            | 0            | 0            |
| BraA07003302 |                             | 0            | 0            | 0            | 0            |
| BraA07003303 | ATHB29,ZFHD1                | -1.996368338 | -0.0771219   | -0.2908072   | -0.508143673 |
| BraA07003304 | RPL34                       | 0.810868157  | -0.027235497 | 0.100142234  | 0.336410119  |
| BraA07003305 |                             | 0            | 0            | 0            | 0            |
| BraA07003306 |                             | -2.565220526 | -1.803742376 | -2.508243348 | -2.221934294 |
| BraA07003307 | ANAC9,FEZ                   | 0            | 0            | 0            | 0            |
| BraA07003308 | SBH1                        | -0.058183239 | 0.428055288  | 0.268287617  | 0.107212295  |
| BraA07003309 |                             | 0            | 0            | 0            | 0            |
| BraA07003310 |                             | -1.358515035 | -1.365834825 | -1.636301106 | -2.125156152 |
| BraA07003311 | TCP15                       | -0.654302922 | -1.836027063 | -2.542691743 | -2.54908589  |
| BraA07003312 | ATHVA22C,HVA22C             | -0.507305723 | -0.11053485  | -0.315242345 | -0.58336982  |
| BraA07003313 | ATERF-8,ATERF8,ERF8         | 0            | 0            | 0            | 0            |
| BraA07003314 | HEMB1                       | 1.06383972   | -0.427932502 | 0.080928944  | 0.015730544  |
| BraA07003315 | RPL1C,SAG24                 | 0.709543927  | -0.068050411 | 0.217396083  | 0.479313224  |
| BraA07003316 | ATCOX19-2,COX19-2           | 0.444095017  | -0.070678887 | 0.146726118  | 0.146694015  |
| BraA07003317 |                             | -0.445425963 | -0.52038193  | -0.436783604 | -1.508031714 |
| BraA07003318 | ATHB13                      | 0.212048087  | 0.885341502  | -0.136367373 | 0.058138077  |
| BraA07003319 |                             | -3.959236104 | -0.8790518   | -0.425097712 | -1.044290267 |
| BraA07003320 | ATUBC2,UBC2                 | -0.218548852 | 0.085066184  | 0.001534735  | -0.105145336 |
| BraA07003321 |                             | 2.007682573  | 0.951876892  | 0.955252912  | 0.97340173   |
| BraA07003322 |                             | 0            | 0            | 0            | 0            |
| BraA07003323 | AMY3,ATAMY3                 | 0.058761421  | -0.04900579  | -0.105910593 | -0.418518993 |
| BraA07003324 |                             | -0.407897429 | -0.227131843 | -0.170880626 | -0.390399819 |
| BraA07003325 |                             | 0            | 0            | 0            | 0            |
| BraA07003326 |                             | 0            | 0            | 0            | 0            |
| BraA07003327 | NRT1.7                      | -0.237213693 | 2.079029788  | 0.914893459  | -0.52974533  |
| BraA07003328 | ATH8,TH8                    | -4.147111883 | 0.011302919  | 0.014825807  | 0.326024446  |
| BraA07003329 |                             | 0.659986792  | -0.62138766  | -0.145763005 | -0.062667558 |
| BraA07003330 |                             | 0            | 0            | 0            | 0            |
| BraA07003331 |                             | 0.139861977  | -1.500601889 | -1.584068644 | -1.543773037 |
| BraA07003332 |                             | -1.98145042  | -1.518990293 | -2.043390913 | -1.136075401 |
| BraA07003333 | ATGSTU12,GSTU12             | -0.040898739 | 0.719152717  | -0.08407556  | -0.062795447 |
| BraA07003334 | ATGSTU12,GSTU12             | 0.920318158  | -1.753822378 | -2.41117852  | -1.458809745 |
| BraA07003335 | iqd9                        | -1.533883953 | -1.723365999 | -1.566756738 | -1.392266224 |
| BraA07003336 | ATGSTU11,GSTU11             | 0.225231962  | -2.346814567 | -2.47978451  | -1.343087606 |
| BraA07003337 | SHW1                        | 0.502770241  | -0.388648821 | -0.307242829 | 0.050609887  |
| BraA07003338 |                             | -0.122802444 | -0.081306129 | 0.033791375  | -0.063511765 |

|              |                            |              |              |              |              |
|--------------|----------------------------|--------------|--------------|--------------|--------------|
| BraA07003339 | PP2A                       | -0.547953833 | -0.456162587 | -0.615267993 | -0.491998114 |
| BraA07003340 | CLE26                      | -0.346482727 | -0.1315724   | -0.447969655 | 0.204960536  |
| BraA07003341 |                            | -0.29312544  | -0.271966349 | -0.456012864 | -0.392722506 |
| BraA07003342 |                            | -4.68747763  | 1.40066095   | -2.402894539 | -0.91327674  |
| BraA07003343 |                            | 0            | 0            | 0            | 0            |
| BraA07003344 |                            | 0            | 0            | 0            | 0            |
| BraA07003345 | SNL4                       | -0.020553709 | 0.113724112  | -0.127337828 | -0.206728287 |
| BraA07003346 | EMB25,ISE2,PDE317          | 0.907634538  | -0.347235699 | -0.104164723 | -0.108798109 |
| BraA07003347 |                            | 0            | 0            | 0            | 0            |
| BraA07003348 | IAR4                       | -0.816149853 | -0.143736224 | 0.092144142  | -0.362507641 |
| BraA07003349 | GATL9,LGT8                 | 0.854628935  | 0.482870426  | 0.031090353  | 0.391683258  |
| BraA07003350 |                            | -0.139473334 | 0.329438158  | 0.226560648  | 0.268138311  |
| BraA07003351 |                            | 0            | 0            | 0            | 0            |
| BraA07003352 |                            | 0            | 0            | 0            | 0            |
| BraA07003353 |                            | 1.333544553  | 2.720344496  | -0.054274092 | 1.008348803  |
| BraA07003354 | ATFH8,FH8                  | -0.149355127 | -0.016228135 | -1.373444795 | 0.107942406  |
| BraA07003355 |                            | 0.52759028   | 0.492108419  | 0.42476626   | 0.320268323  |
| BraA07003356 |                            | -0.257591825 | -0.136182335 | -0.4004396   | -0.520265127 |
| BraA07003357 |                            | 0            | 0            | 0            | 0            |
| BraA07003358 |                            | 0            | 0            | 0            | 0            |
| BraA07003359 | MMP                        | 1.890945807  | -0.709900132 | -0.718137346 | -0.400273698 |
| BraA07003360 | ATCYCD1;1,CYCD1;1          | 1.404705321  | 0.521268122  | 0.572906     | 0.99951361   |
| BraA07003361 | TBL27                      | -1.124842443 | 0.123152028  | 0.015940256  | 0.680445153  |
| BraA07003362 |                            | -8.202331942 | 0            | -0.7177701   | 0.122503092  |
| BraA07003363 |                            | -1.144343838 | -0.28506005  | -0.403188966 | -0.242489162 |
| BraA07003364 |                            | 0            | 0            | 0            | 0            |
| BraA07003365 |                            | -1.149715116 | -2.375615449 | -2.677885534 | -3.191679307 |
| BraA07003366 | KUP6                       | -1.280184071 | -1.267595861 | -1.160563106 | -0.959194093 |
| BraA07003367 | ENT1,ENT1AT                | 0            | 0            | 0            | 0            |
| BraA07003368 | PG2                        | -0.095921898 | 0.179186264  | -0.131347622 | -0.346596199 |
| BraA07003369 |                            | 0            | -0.458531044 | 0            | 0            |
| BraA07003370 | ATBCA4,BCA4,CA4            | -0.529754467 | -1.634485623 | -0.021364591 | -0.06287452  |
| BraA07003371 |                            | 0            | 0            | 0            | 0            |
| BraA07003372 |                            | -0.718067587 | -0.11378968  | -0.695551779 | -1.563068126 |
| BraA07003373 |                            | 0.143308657  | -0.406552625 | -1.026449138 | -1.35389833  |
| BraA07003374 | SRO3                       | 0            | 0            | 0            | 0            |
| BraA07003375 | RHS1                       | -5.43168549  | -4.870532643 | -6.301740444 | 0            |
| BraA07003376 |                            | -0.022514301 | -0.148148246 | 0.35022392   | 0.292933174  |
| BraA07003377 |                            | -0.444861763 | -0.418407078 | -0.444959138 | -0.14059525  |
| BraA07003378 | ARF1,ATARF,ATARF1,ATARFA1A | -0.681306148 | -0.366858592 | -0.413044848 | -0.572166967 |
| BraA07003379 |                            | -0.204885915 | -0.299199122 | -0.259231984 | 0.058831291  |
| BraA07003380 |                            | -1.420141545 | 0.651730388  | -1.132853535 | -1.54973114  |
| BraA07003381 |                            | 0.75252361   | -0.442494549 | -0.225360882 | 0.191063557  |
| BraA07003382 |                            | 0.201122338  | 0.357612919  | -0.470389489 | 0.736347688  |
| BraA07003383 |                            | 0.293281522  | 1.457356046  | 0.893026998  | 1.156202085  |
| BraA07003384 |                            | 1.396321252  | 1.50418602   | 0.697415677  | 1.19019045   |
| BraA07003385 |                            | -1.548925943 | 0.03219445   | -0.229038138 | -0.96438502  |
| BraA07003386 | CRK2                       | -1.546717648 | -2.225280011 | -2.738172422 | -2.887211662 |
| BraA07003387 | CRK3                       | 0            | 0            | 0            | 0            |
| BraA07003388 | CRK3                       | -0.793715559 | -0.784310255 | -1.593536027 | -2.365038286 |
| BraA07003389 | CRK3                       | 1.826908473  | 2.426751153  | 2.209685867  | 1.217640824  |
| BraA07003390 |                            | 0.026281736  | -0.33655992  | -0.159299051 | -0.298703579 |
| BraA07003391 | SAV3,TAA1,WEI8             | -1.597270787 | -1.416715253 | 0.660911301  | -0.689654614 |
| BraA07003392 | AOAT2,GGT2                 | -0.608424482 | -0.205140054 | -0.873433048 | -1.233039525 |
| BraA07003393 |                            | -5.271366891 | -4.337336223 | -3.1106792   | -3.36904766  |
| BraA07003394 |                            | -0.973678842 | -1.19934238  | -1.131341054 | -1.051711403 |
| BraA07003395 |                            | 0.051067891  | -0.739553972 | -0.332714828 | 0.140960235  |
| BraA07003396 |                            | 0.391096987  | -0.073165208 | 0.1532493    | 0.368824436  |
| BraA07003397 |                            | -0.776418693 | -0.372059689 | -0.321811553 | -0.547558585 |
| BraA07003398 |                            | -4.618084289 | 0.125319665  | -0.074484416 | 0.418528603  |
| BraA07003399 |                            | 0.522043117  | 0.866496802  | -0.652327805 | 0.111761626  |
| BraA07003400 |                            | -0.589848461 | -0.444621445 | -0.394446744 | -0.250784318 |
| BraA07003401 |                            | -0.399392448 | -0.295191876 | -0.304520226 | -0.450330743 |
| BraA07003402 | HWI1,PDLP5                 | -3.047486063 | -2.1512071   | -1.095172912 | -0.707645635 |
| BraA07003403 | JAZ9,TIFY7                 | 0.842342679  | -1.155301133 | -0.099256854 | -0.577081025 |
| BraA07003404 | ATGH9B1,CEL1,GH9B1         | 0.165385744  | -0.299628545 | 0.189041033  | 0.650050353  |
| BraA07003405 |                            | -0.939767618 | -1.139304732 | -1.928287456 | 0            |
| BraA07003406 |                            | 1.627920983  | 0.672535412  | -0.176586623 | 1.499371608  |
| BraA07003407 | CRR23                      | 2.274000863  | -1.608211737 | -0.987398674 | -0.661148983 |

|              |                  |              |              |              |              |
|--------------|------------------|--------------|--------------|--------------|--------------|
| BraA07003408 |                  | 0            | 0            | 0            | 0            |
| BraA07003409 |                  | 0.464092724  | 0.180508294  | 0.103336276  | 0.064731451  |
| BraA07003410 |                  | 0.263586987  | -0.042451453 | 0.04472756   | 0.18250086   |
| BraA07003411 |                  | -0.211888415 | -0.155377124 | -0.554953867 | -0.237782958 |
| BraA07003412 |                  | -3.830032692 | -0.844504622 | -0.934760768 | -0.702861042 |
| BraA07003413 |                  | 1.448098118  | -1.219240075 | -0.824896473 | -0.54553055  |
| BraA07003414 |                  | -1.718229051 | -1.402596142 | -1.213987814 | -1.861461537 |
| BraA07003415 | MLP28            | 0.198723481  | 0.230024079  | 0.748473333  | 1.229531326  |
| BraA07003416 | MLP28            | 0.295158933  | 0.514816504  | 1.156727139  | 1.11385311   |
| BraA07003417 |                  | -0.57522424  | 0            | 0            | 0.106781039  |
| BraA07003418 |                  | 0            | 0            | 0            | 0            |
| BraA07003419 |                  | 0            | 0            | 0            | 0            |
| BraA07003420 | MLP28            | -1.538281672 | 0.431128634  | 2.074169072  | 0.902004556  |
| BraA07003421 | MLP31            | 1.159196119  | 1.617444455  | 1.03859365   | 0.730192081  |
| BraA07003422 | CLE17            | 0.139344438  | 0.152961776  | 0.178020676  | 0.249408394  |
| BraA07003423 |                  | 0.206058316  | 0.096522441  | -0.090560527 | -0.127577439 |
| BraA07003424 | ATHB18,HB18      | -2.797301881 | 0.366202321  | -0.155464275 | -0.284784823 |
| BraA07003425 | ATPIN3,PIN3      | 0.013601076  | 0.009764622  | -0.33025515  | -0.455370732 |
| BraA07003426 | ATPIN3,PIN3      | 0            | 0            | 0            | 0            |
| BraA07003427 |                  | -0.22326579  | 0.093740502  | -0.621586734 | -0.279867605 |
| BraA07003428 |                  | -0.676925552 | 0.783655668  | 0.487191208  | -0.364203088 |
| BraA07003429 |                  | 0.249937766  | -0.364745086 | -0.502574346 | -0.446594792 |
| BraA07003430 |                  | -1.528579802 | -1.721196796 | -0.933278608 | -0.874715337 |
| BraA07003431 |                  | 0            | 0            | 0            | 0            |
| BraA07003432 | FAB1C            | -0.479667378 | 0.312049556  | -0.196614684 | -0.016732541 |
| BraA07003433 |                  | -3.796921052 | 0            | 0            | 0            |
| BraA07003434 |                  | -3.098020169 | -0.980926322 | -1.198844441 | -0.936428889 |
| BraA07003435 |                  | -2.920049245 | -0.636615394 | -1.232316523 | -1.541379812 |
| BraA07003436 | ATMYBL2,MYBL2    | -0.251067533 | -2.006065662 | -2.850943807 | -2.55106084  |
| BraA07003437 | LPR2             | -1.217554056 | -0.716662705 | -0.796255657 | -0.66404822  |
| BraA07003438 |                  | 0            | -0.271623937 | -1.904938959 | 0            |
| BraA07003439 |                  | 2.112779537  | -0.914264936 | -0.517639564 | 0.122572606  |
| BraA07003440 |                  | -0.427128358 | -0.158176985 | -0.184139828 | -0.112291655 |
| BraA07003441 | PIN-LIKE2        | -0.358872136 | -0.359029898 | -0.566021872 | -0.676487148 |
| BraA07003442 |                  | -1.557831024 | -0.882021942 | -1.494958513 | -0.937078544 |
| BraA07003443 |                  | -1.696272408 | 0.786702117  | 0.041657339  | -1.14796511  |
| BraA07003444 |                  | 0            | 0            | 0            | 0            |
| BraA07003445 |                  | 0            | 0            | 0            | 0            |
| BraA07003446 |                  | 0            | -3.183334915 | -3.096441517 | -1.684969152 |
| BraA07003447 |                  | 0            | 0            | -8.161651192 | 0            |
| BraA07003448 |                  | 0            | -2.008732468 | 0            | 0            |
| BraA07003449 |                  | 0.16760469   | 0.010247568  | -0.04856831  | 0.00904417   |
| BraA07003450 | EBS1,PSL2,UGGT   | 0.347834832  | 0.599589207  | 0.40880895   | 0.099073333  |
| BraA07003451 |                  | 0.923491845  | 0.065118144  | 0.628775269  | 0.574098517  |
| BraA07003452 |                  | -0.205882345 | 0.001529856  | 0.182996171  | 0.150577159  |
| BraA07003453 |                  | -1.089444667 | -1.155155471 | -1.339412315 | -1.1636263   |
| BraA07003454 |                  | 0            | 0            | 0            | 0            |
| BraA07003455 | ATWHY2,WHY2      | -0.546517102 | -0.399606547 | -0.1203403   | 0.069072615  |
| BraA07003456 | ATVPS52,POK,TTD8 | 0.430679838  | 0.32128757   | 0.378300724  | 0.159244023  |
